# Supplementary material for: Early events marking lung fibroblast transition to profibrotic state in idiopathic pulmonary fibrosis
Source: PubMed Central journal article supplement (PMC10122312; doi:10.1186/s12931-023-02419-0), 2023-04-21
Supplement: 12931_2023_2419_MOESM2_ESM.pdf [file 12931_2023_2419_MOESM2_ESM.pdf]

*Jia et al., “Early events marking lung fibroblast transition to profibrotic state in idiopathic pulmonary fibrosis”*

## **SUPPLEMENTAL FIGURES**

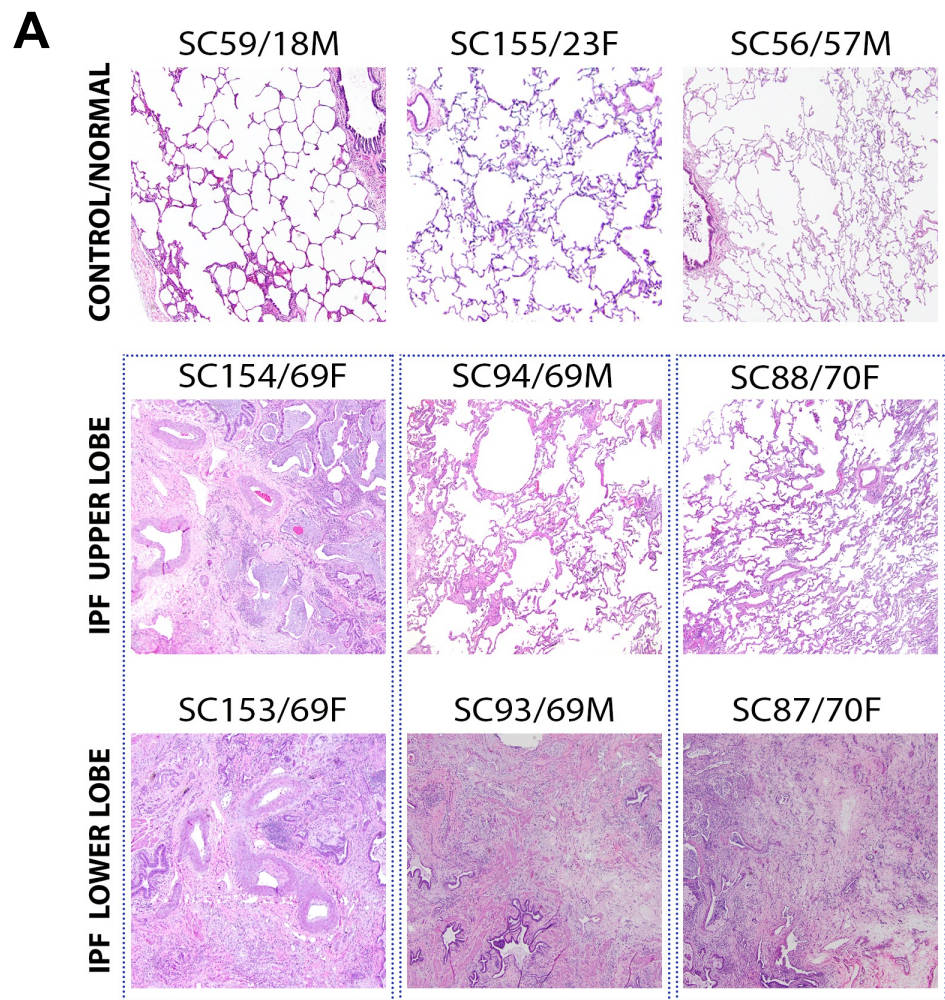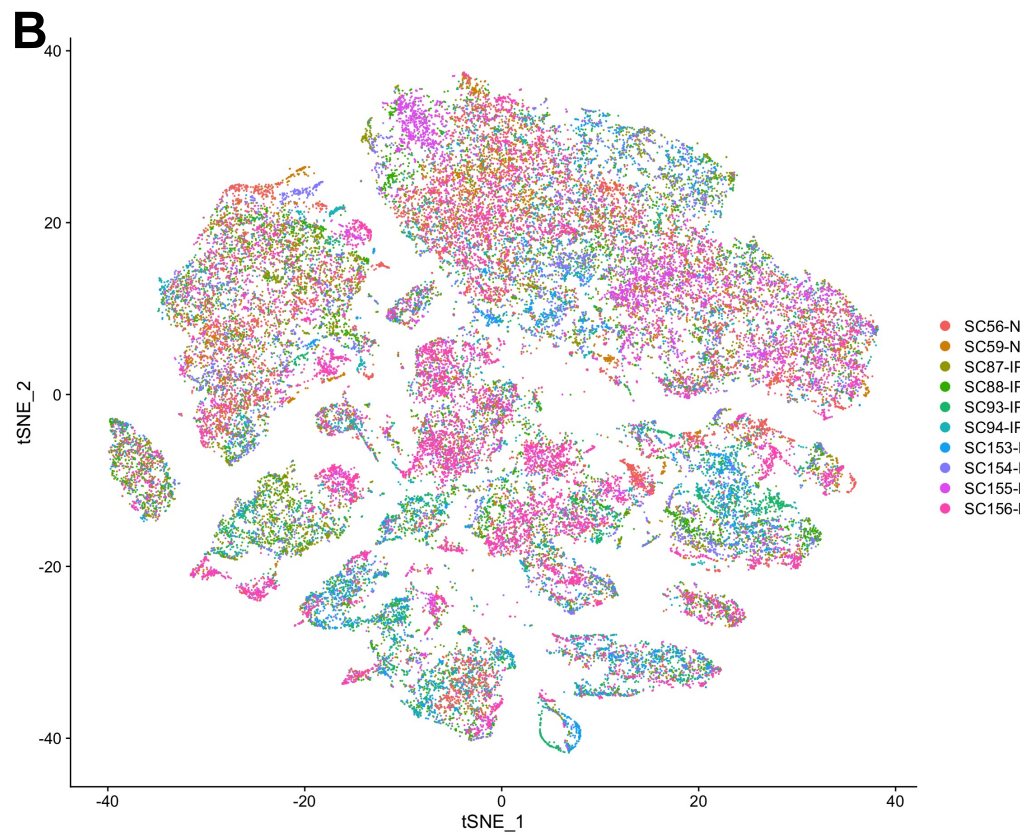

**FIGURE S1**

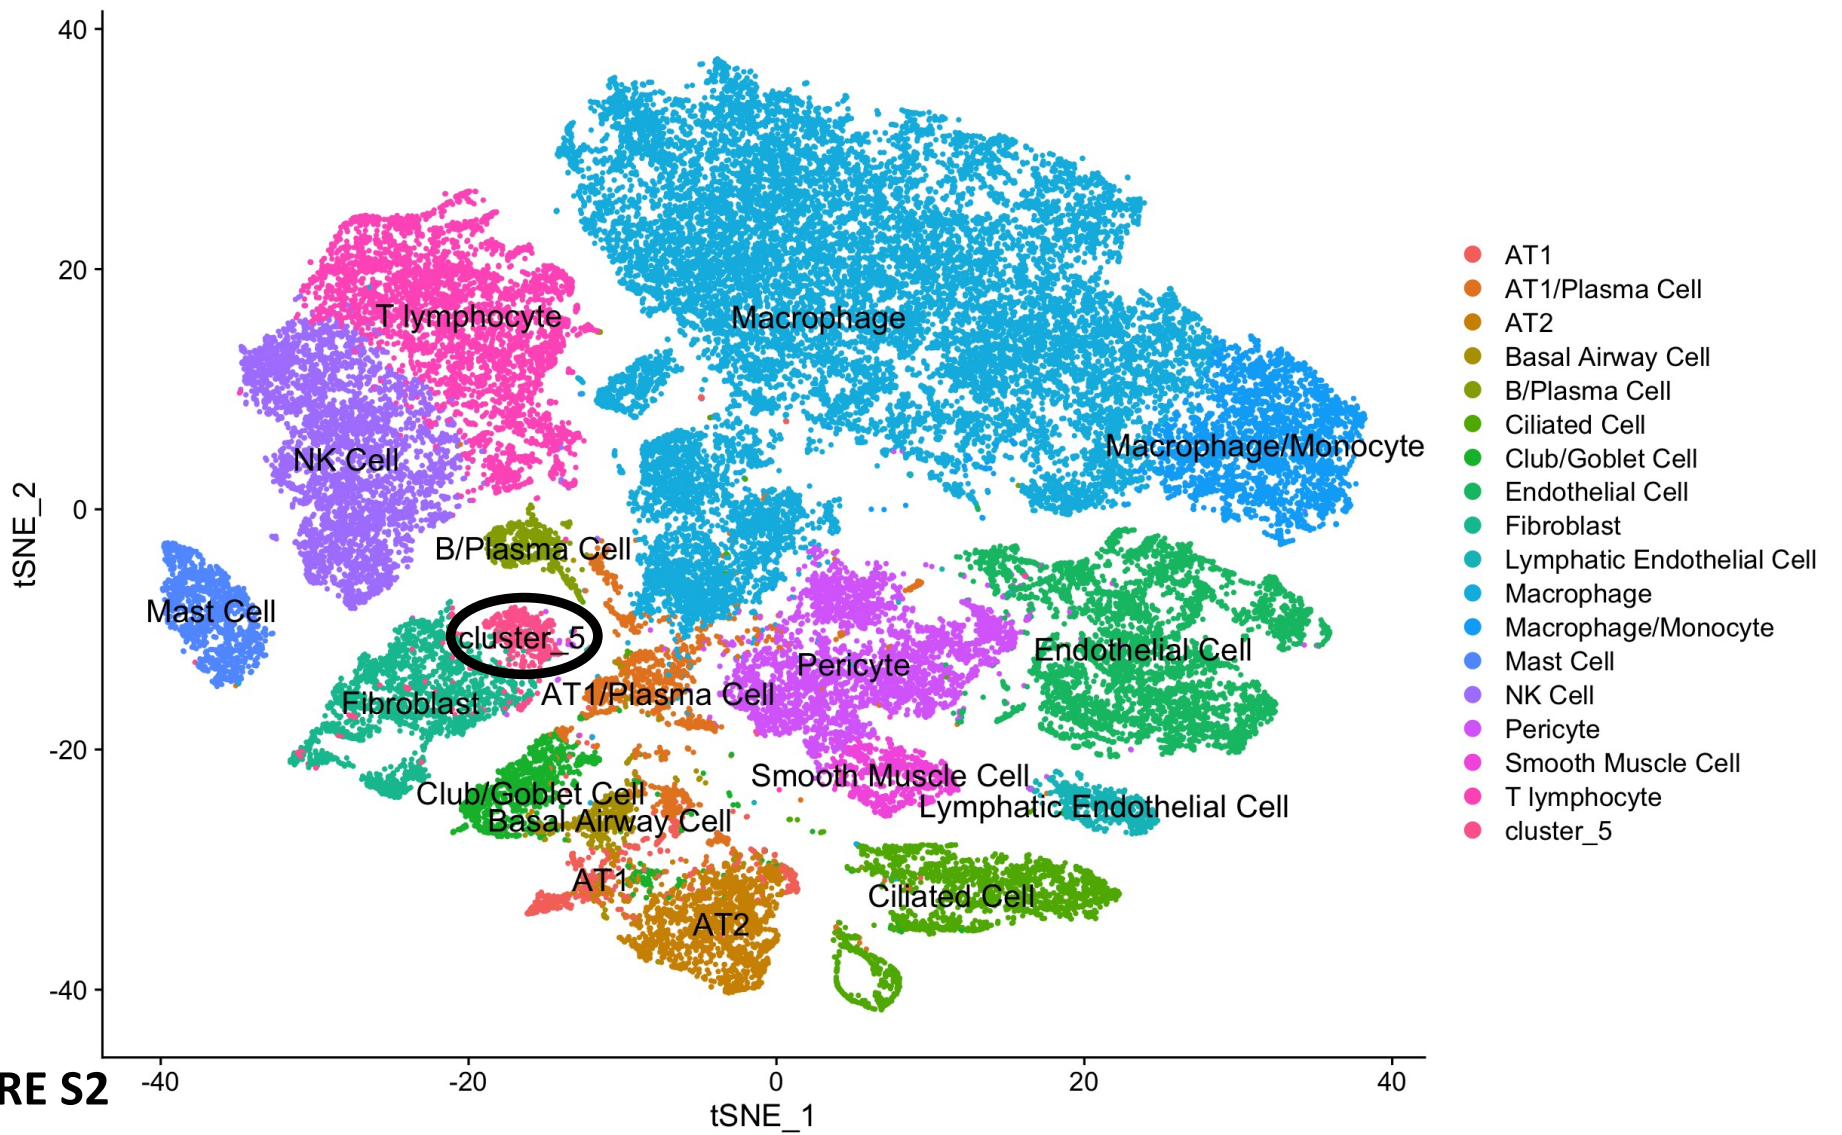

**FIGURE S2**

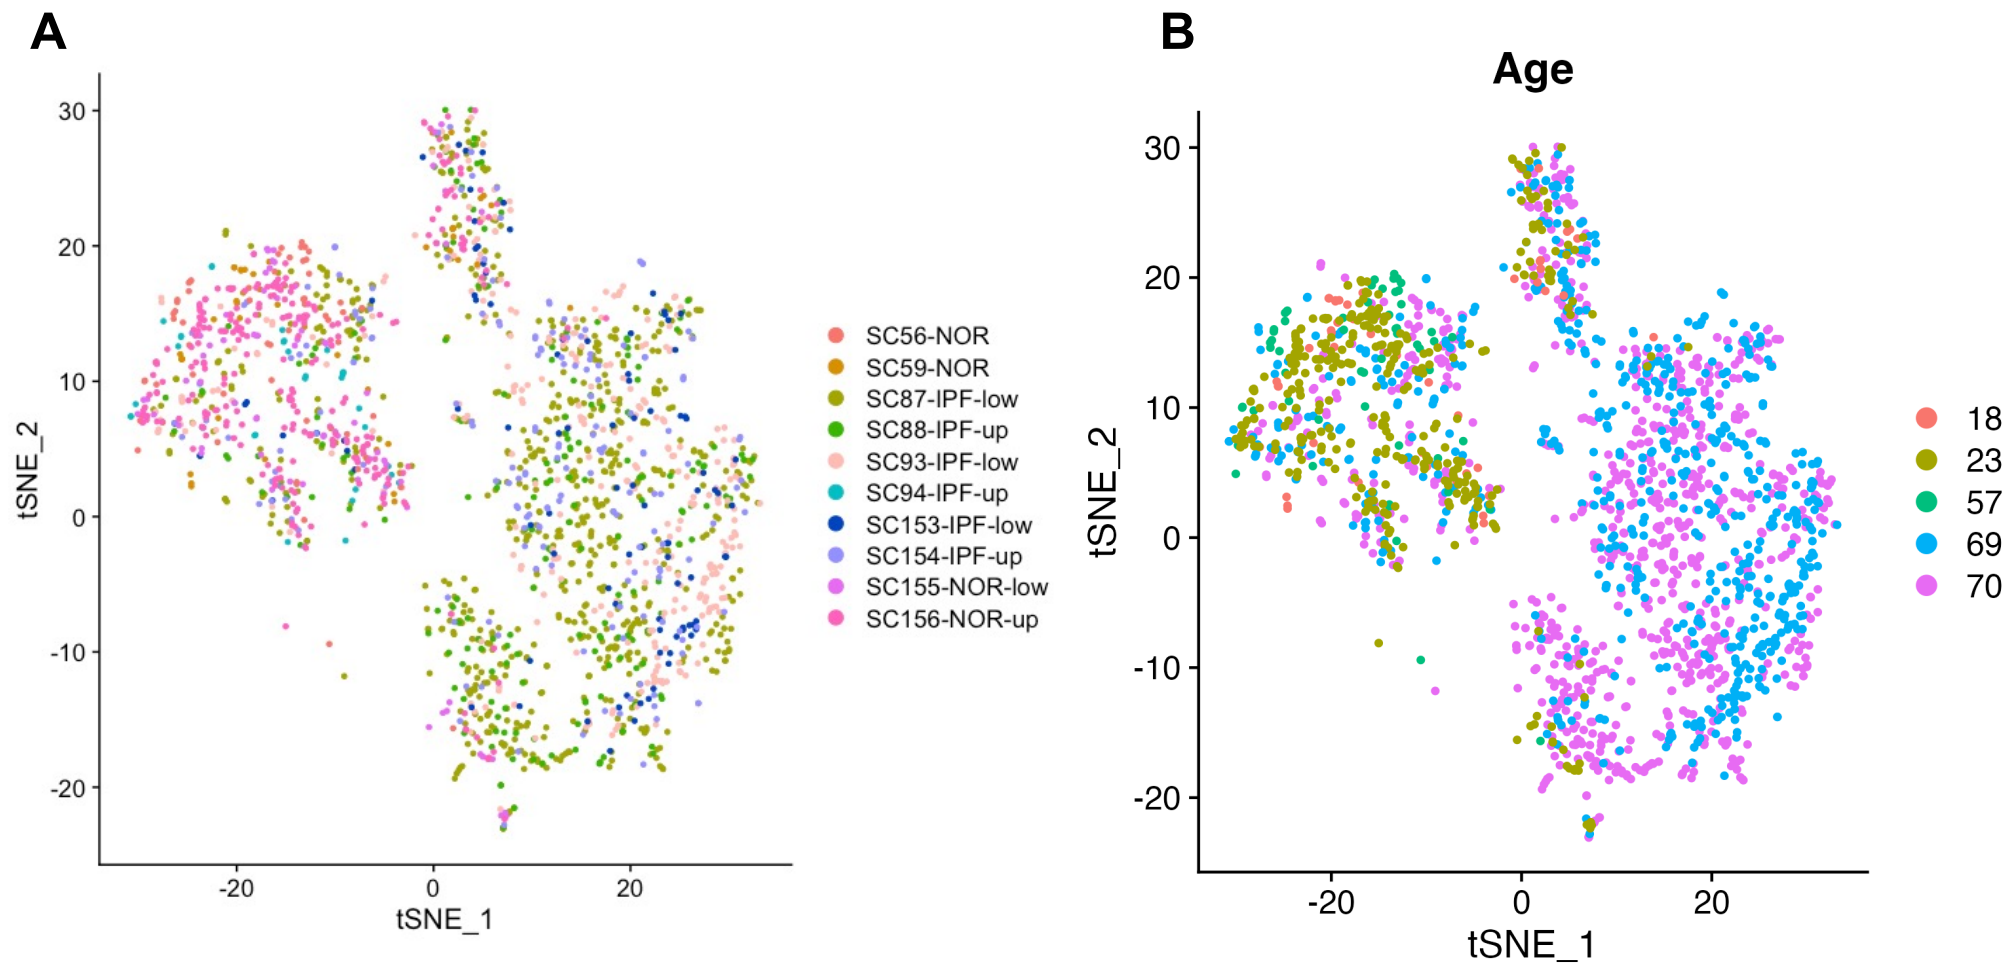

**FIGURE S3**

**A**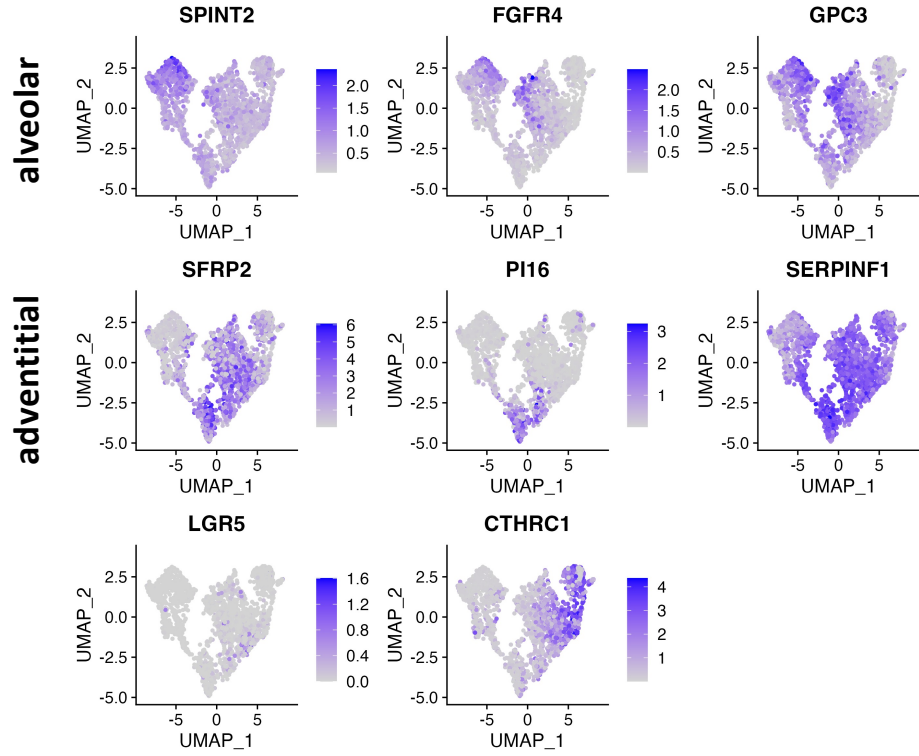**B**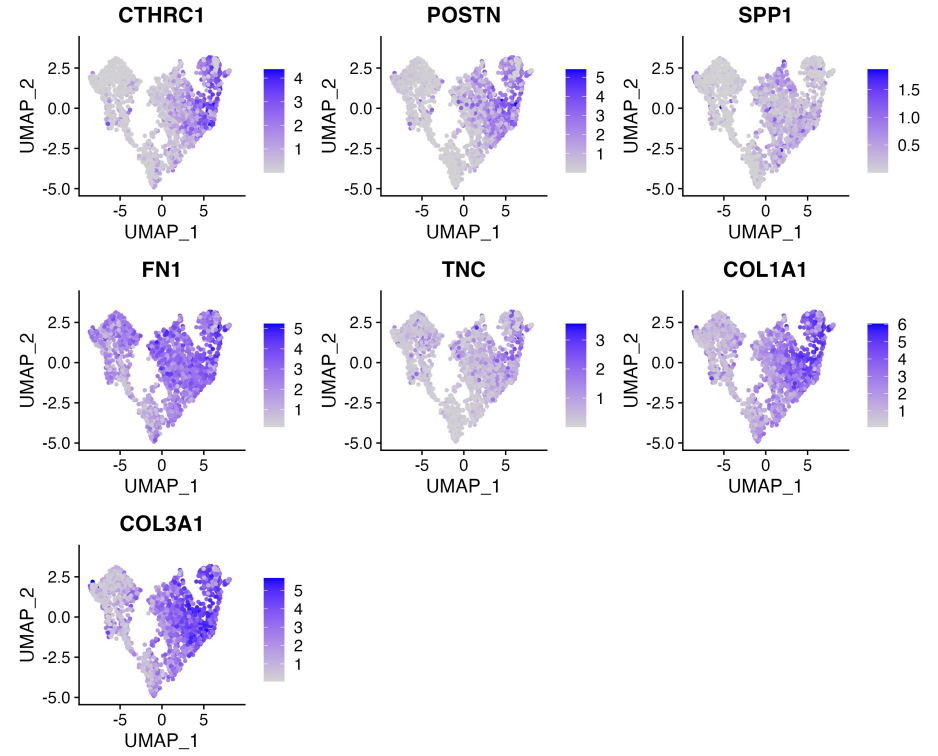**FIGURE S4**

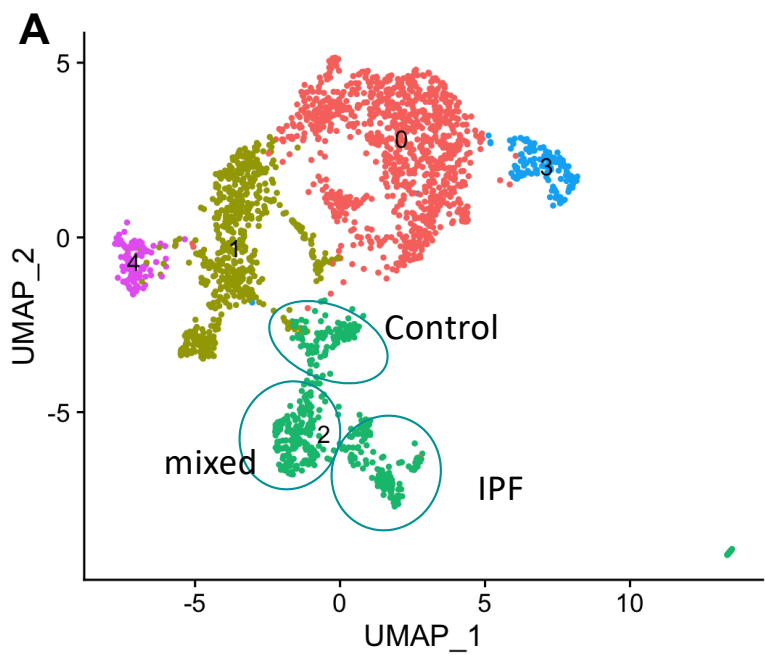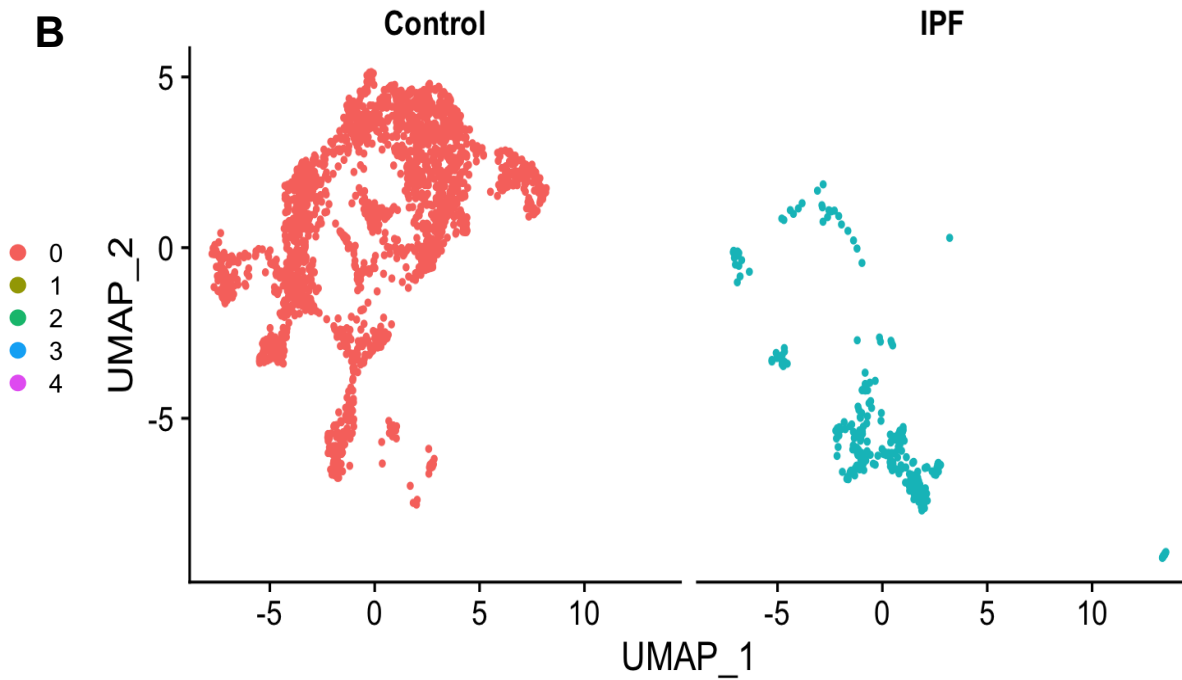

**FIGURE S5**

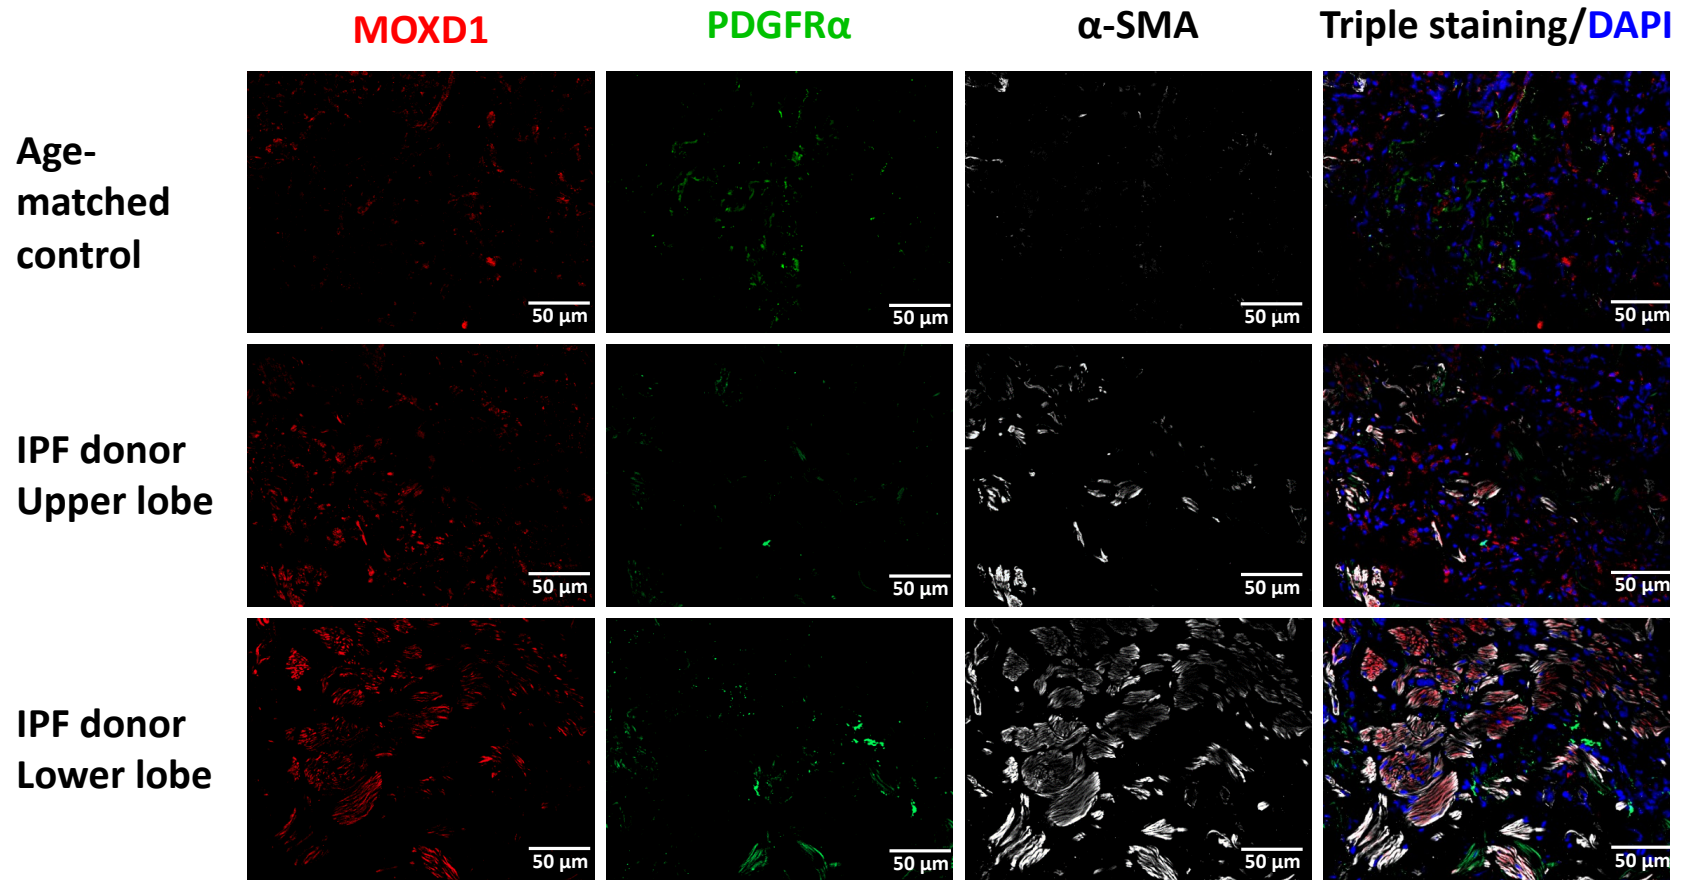

**FIGURE S6**

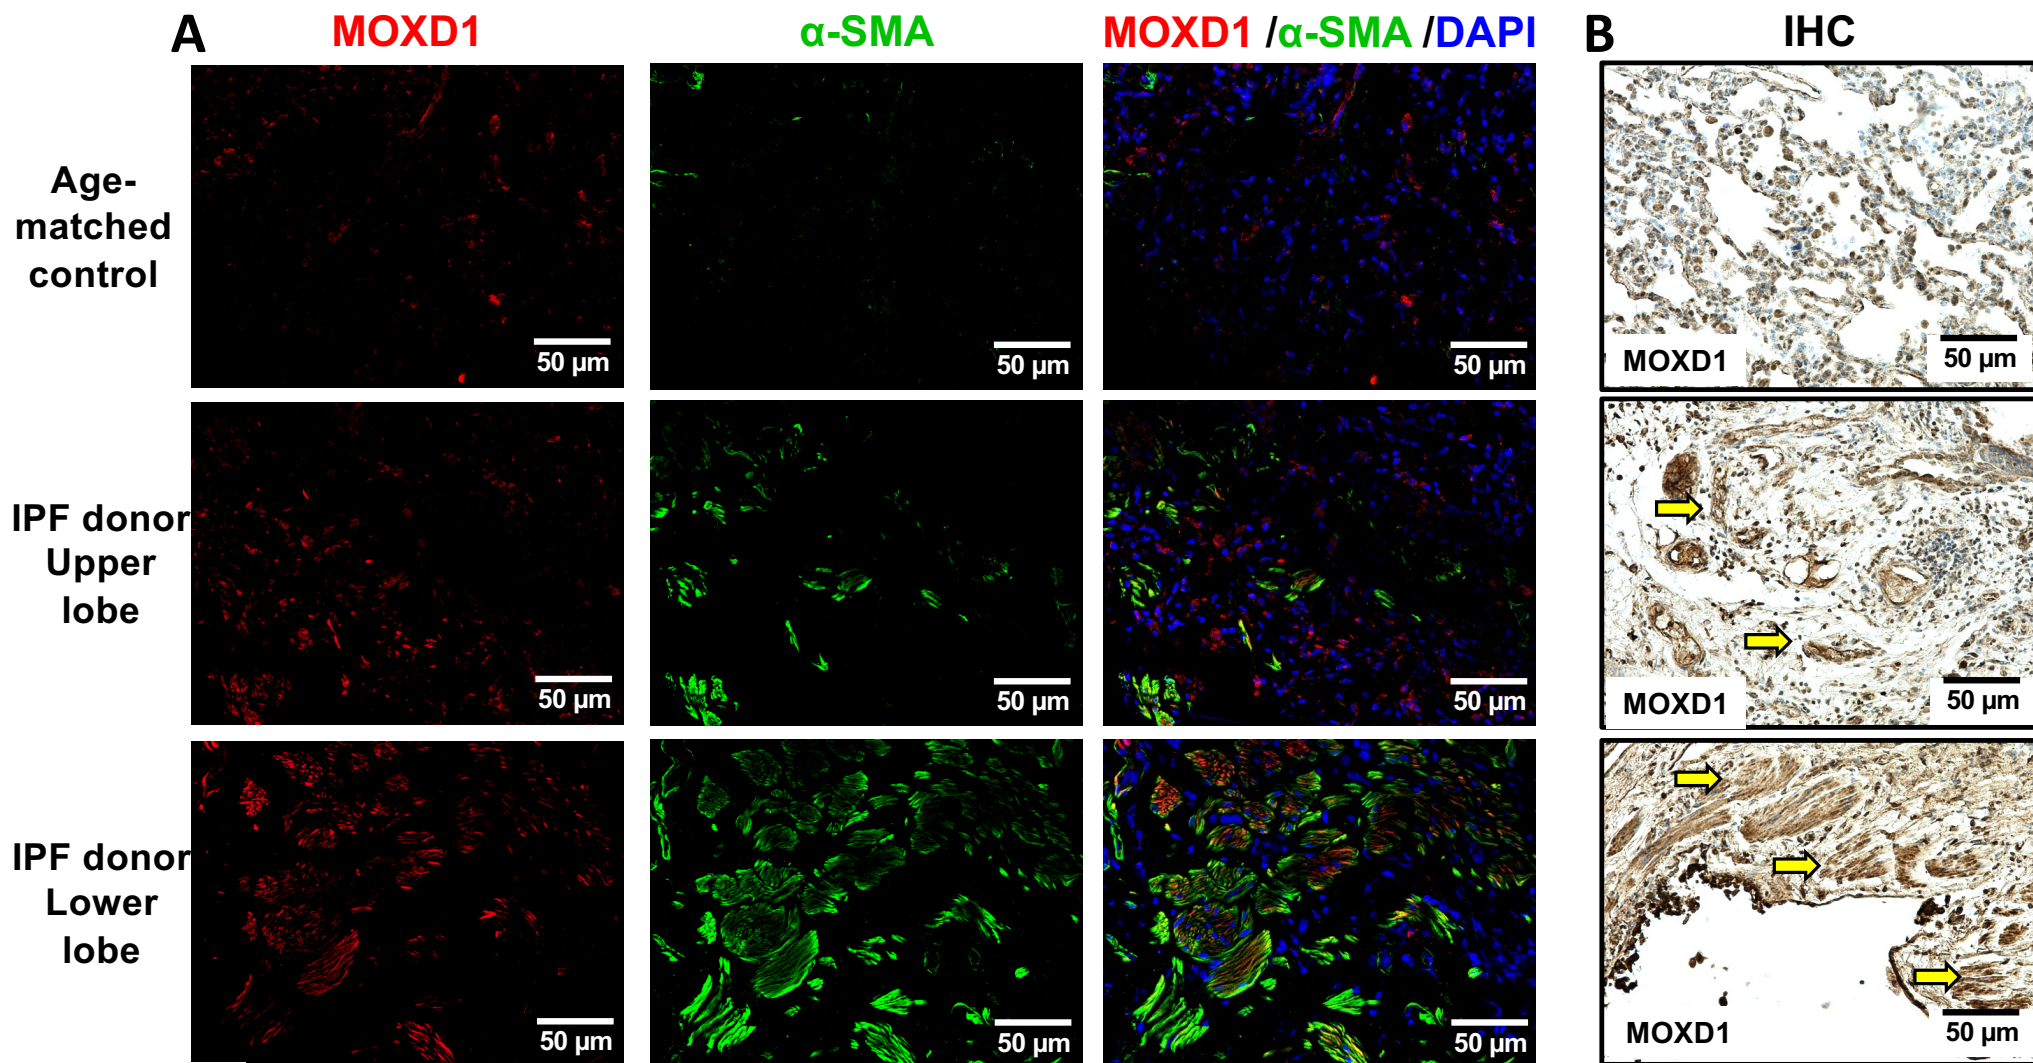

**FIGURE S7**
